# Supplementary material for: Influence of the grain orientation on the charge transport properties of organic field-effect transistors
Source: Royal Society of Chemistry journal article supplement (doi:10.1039/c4ra04964k), 2014-01-01
Supplement: c4ra04964k1.pdf [file c4ra04964k1.pdf]

## Supplementary information

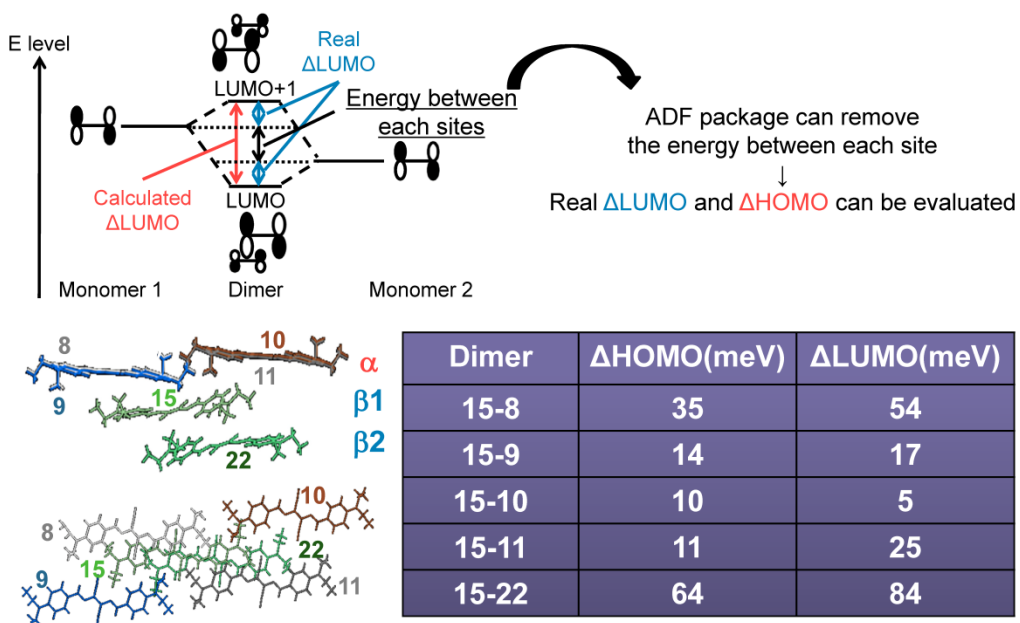

**Figure S1**

Summary of the HOMO/LUMO splittings calculated in different DE2 dimers using the ADF package.

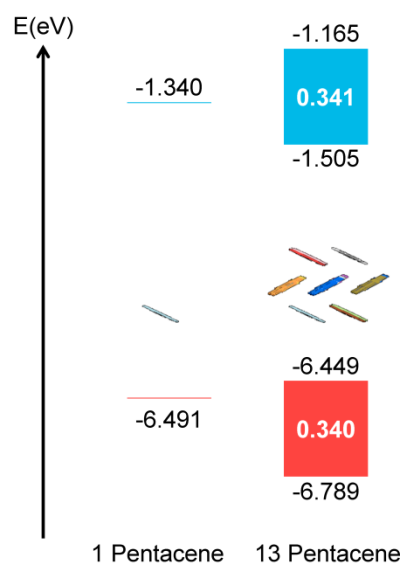

**Figure S2**

HOMO and LUMO splittings calculated for a 3D cluster of 13 molecules in pentacene crystal.
